# Supplementary material
Source: publisher figshare collection journal article supplement (https://acs.figshare.com/ndownloader/files/4109485)
Supplement: Supplementary file 1 [file 4109485]

## Supporting Information

### 1. Detailed derivation process of the model

The dissociation constant of D- and L-PHG:

$$K_a = \frac{[D^-]_w [H^+]}{[DH]_w} = \frac{[L^-]_w [H^+]}{[LH]_w} \quad (1)$$

The complexation equilibrium constants of  $CuPF_6$ -(s)-BINAP (BINAP-Cu) with PHG enantiomers at the interface can be written as follows:

$$K_D = \frac{[CuBD]_{org} [PF_6^-]_w}{[CuB]_{org} [D^-]_w} \quad (2)$$

$$K_L = \frac{[CuBL]_{org} [PF_6^-]_w}{[CuB]_{org} [L^-]_w} \quad (3)$$

Due to  $V_{aq} = V_{org}$ , mass balance for D- and L-PHG:

$$C_D^{tot} = [DH]_w + [D^-]_w + [CuBD]_{org} \quad (4)$$

$$C_L^{tot} = [LH]_w + [L^-]_w + [CuBL]_{org} \quad (5)$$

where,  $C_D^{tot}$  and  $C_L^{tot}$  are the initial concentrations of D- and L-PHG in the aqueous phase, respectively;  $[DH]_w$  and  $[LH]_w$  are the concentration of molecular D- and L-PHG in the aqueous phase, respectively;  $[D^-]_w$  and  $[L^-]_w$  are the anion D- and L-PHG in the aqueous phase, respectively;  $[CuBD]_{org}$  and  $[CuBL]_{org}$  are the concentrations of the complexes of BINAP-Cu with D- and L-PHG in the organic phase, respectively;  $[CuB]_{org}$  are the concentrations of BINAP-Cu in the organic phase at equilibrium.

With eqs 1 - 3 substituted in eqs 4 and 5:

$$C_D^{tot} = [DH]_w + [D^-]_w + [CuBD]_{org} = \frac{[D^-]_w [H^+]}{K_a} + [D^-]_w + \frac{[CuB]_{org} [D^-]_w K_D}{[PF_6^-]_w} \quad (6)$$

$$C_L^{\text{tot}} = [\text{LH}]_w + [\text{L}^-]_w + [\text{CuBL}]_{\text{org}} = \frac{[\text{L}^-]_w [\text{H}^+]}{K_a} + [\text{L}^-]_w + \frac{[\text{CuB}]_{\text{org}} [\text{L}^-]_w K_L}{[\text{PF}_6^-]_w} \quad (7)$$

where  $C_{\text{CuB}}^{\text{tot}}$  is the initial concentration of BINAP-Cu in the organic phase;  $[\text{PF}_6^-]_w$  is the concentration of  $\text{PF}_6^-$  in aqueous phase.

$[\text{D}^-]_w$  and  $[\text{L}^-]_w$  can be calculated from eqs 6 and 7 as following:

$$[\text{D}^-]_w = \frac{C_D^{\text{tot}}}{\frac{[\text{H}^+]}{K_a} + 1 + \frac{[\text{CuB}]_{\text{org}} K_D}{[\text{PF}_6^-]_w}} \quad (8)$$

$$[\text{L}^-]_w = \frac{C_L^{\text{tot}}}{\frac{[\text{H}^+]}{K_a} + 1 + \frac{[\text{CuB}]_{\text{org}} K_L}{[\text{PF}_6^-]_w}} \quad (9)$$

Mass balance for  $C_{\text{CuB}}$ :

$$C_{\text{CuB}}^{\text{tot}} = [\text{CuB}]_{\text{org}} + [\text{CuBD}]_{\text{org}} + [\text{CuBL}]_{\text{org}} \quad (10)$$

With eqs 2 and 3 substituted in eq 8:

$$C_{\text{CuB}}^{\text{tot}} = [\text{CuB}]_{\text{org}} + \frac{[\text{CuB}]_{\text{org}} [\text{D}^-]_w K_D}{[\text{PF}_6^-]_w} + \frac{[\text{CuB}]_{\text{org}} [\text{L}^-]_w K_L}{[\text{PF}_6^-]_w} \quad (11)$$

Defining  $A = 1 + \frac{[\text{H}^+]}{K_a}$ , and substituting eqs 8 and 9 in eq 11:

$$\begin{aligned} C_{\text{CuB}}^{\text{tot}} &= [\text{CuB}]_{\text{org}} + \frac{K_D C_D^{\text{tot}} [\text{CuB}]_{\text{org}}}{\left( A + \frac{[\text{CuB}]_{\text{org}} K_D}{[\text{PF}_6^-]_w} \right) [\text{PF}_6^-]_w} + \frac{K_L C_L^{\text{tot}} [\text{CuB}]_{\text{org}}}{\left( A + \frac{[\text{CuB}]_{\text{org}} K_L}{[\text{PF}_6^-]_w} \right) [\text{PF}_6^-]_w} \\ &= [\text{CuB}]_{\text{org}} + \frac{K_D C_D^{\text{tot}} [\text{CuB}]_{\text{org}}}{A [\text{PF}_6^-]_w + [\text{CuB}]_{\text{org}} K_D} + \frac{K_L C_L^{\text{tot}} [\text{CuB}]_{\text{org}}}{A [\text{PF}_6^-]_w + [\text{CuB}]_{\text{org}} K_L} \end{aligned} \quad (12)$$

With further treatment of eq 10 and changing the form of eq 10 into arrangement in

descending powers of  $[\text{CuB}]$ :

$$\begin{aligned} & (K_D K_L - K_D A - K_L A + A^2) [\text{CuB}]_{\text{org}}^3 + (2K_D A C_{\text{CuB}}^{\text{tot}} + 2K_L A C_{\text{CuB}}^{\text{tot}} - 3A^2 C_{\text{CuB}}^{\text{tot}} + K_D K_L C_D^{\text{tot}} - K_D C_D^{\text{tot}} A + \\ & K_D K_L C_L^{\text{tot}} - K_L C_L^{\text{tot}} A - K_D K_L C_{\text{CuB}}^{\text{tot}}) [\text{CuB}]_{\text{org}}^2 + (K_D C_D^{\text{tot}} A C_{\text{CuB}}^{\text{tot}} + K_L C_L^{\text{tot}} A C_{\text{CuB}}^{\text{tot}} - C_{\text{CuB}}^2 K_D A - C_{\text{CuB}}^{\text{tot} 2} K_L A \\ & + 3A^2 C_{\text{CuB}}^{\text{tot} 2}) [\text{CuB}]_{\text{org}} - A^2 C_{\text{CuB}}^{\text{tot} 3} = 0 \end{aligned} \quad (13)$$

$[\text{CuB}]_{\text{org}}$  can be calculated from the eq 13, and distribution ratios can be written as

follows:

$$k_D = \frac{[\text{CuBD}]_{\text{org}}}{[\text{DH}]_{\text{w}} + [\text{D}^-]_{\text{w}}} = \frac{\frac{[\text{CuB}]_{\text{org}} [\text{D}^-]_{\text{w}} K_D}{[\text{PF}_6^-]_{\text{w}}}}{\frac{[\text{D}]_{\text{w}} [\text{H}^+]}{K_a} + [\text{D}^-]_{\text{w}}} = \frac{K_D [\text{CuB}]_{\text{org}}}{[\text{PF}_6^-]_{\text{w}} \left\{ 1 + \frac{[\text{H}^+]}{K_a} \right\}} = \frac{K_D [\text{CuB}]_{\text{org}}}{A [\text{PF}_6^-]_{\text{w}}} \quad (14)$$

$$k_L = \frac{[\text{CuBL}]_{\text{org}}}{[\text{LH}]_{\text{w}} + [\text{L}^-]_{\text{w}}} = \frac{\frac{[\text{CuB}]_{\text{org}} [\text{L}^-]_{\text{w}} K_L}{[\text{PF}_6^-]_{\text{w}}}}{\frac{[\text{L}]_{\text{w}} [\text{H}^+]}{K_a} + [\text{L}^-]_{\text{w}}} = \frac{K_L [\text{CuB}]_{\text{org}}}{[\text{PF}_6^-]_{\text{w}} \left\{ 1 + \frac{[\text{H}^+]}{K_a} \right\}} = \frac{K_L [\text{CuB}]_{\text{org}}}{A [\text{PF}_6^-]_{\text{w}}} \quad (15)$$

$$[\text{PF}_6^-]_{\text{w}} = C_{\text{CuB}}^{\text{tot}} - [\text{CuB}]_{\text{org}} \quad (16)$$

By solving eq 11,  $[\text{CuB}]_{\text{org}}$  can be obtained and  $[\text{PF}_6^-]_{\text{w}}$  is calculated by eq 16. With the calculated  $[\text{CuB}]_{\text{org}}$  and  $[\text{PF}_6^-]_{\text{w}}$  substituted in eq 14 and 15, distribution ratios  $k_D$  and  $k_L$  are calculated as a function of the experimental conditions (such as  $C_{\text{D}}^{\text{tot}}$ ,  $C_{\text{L}}^{\text{tot}}$ ,  $C_{\text{CuB}}^{\text{tot}}$ , pH) and physicochemical constant (such as  $K_a$ ,  $K_D$ ,  $K_L$ ).

Operational enantioselectivity is given by

$$\alpha_{op} = \frac{k_L}{k_D} \quad (17)$$

Intrinsic enantioselectivity is given by

$$\alpha_{int} = \frac{K_L}{K_D} \quad (18)$$

Since  $k_D = \frac{C_{\text{D, org}}^{\text{tot}}}{C_{\text{D, aq}}^{\text{tot}}}$ ,  $C_{\text{D, org}}^{\text{tot}} + C_{\text{D, aq}}^{\text{tot}} = C_{\text{D}}^{\text{tot}}$ ,  $C_{\text{D, org}}^{\text{tot}}$  can be expressed as:

$$C_{\text{D, org}}^{\text{tot}} = \frac{C_{\text{D}}^{\text{tot}}}{1 + 1/k_D} \quad (19)$$

Similarly,  $C_{\text{L, org}}^{\text{tot}}$  can be expressed as:

$$C_{\text{L, org}}^{\text{tot}} = \frac{C_{\text{L}}^{\text{tot}}}{1 + 1/k_L} \quad (20)$$

Therefore, enantiomeric excess in the organic phase is calculated by the following

equation:

$$ee_{\text{org}} = \frac{C_{\text{L, org}}^{\text{tot}} - C_{\text{D, org}}^{\text{tot}}}{C_{\text{L, org}}^{\text{tot}} + C_{\text{D, org}}^{\text{tot}}} = \frac{\frac{C_{\text{L}}^{\text{tot}}}{1 + \frac{1}{k_{\text{L}}}} - \frac{C_{\text{D}}^{\text{tot}}}{1 + \frac{1}{k_{\text{D}}}}}{\frac{C_{\text{L}}^{\text{tot}}}{1 + \frac{1}{k_{\text{L}}}} + \frac{C_{\text{D}}^{\text{tot}}}{1 + \frac{1}{k_{\text{D}}}}} \quad (21)$$

The fraction of L-PHG extracted into the organic phase ( $f_{\text{L}}$ ) is given by

$$f_{\text{L}} = \frac{C_{\text{L, org}}^{\text{tot}}}{C_{\text{L}}^{\text{tot}}} = \frac{\frac{C_{\text{L}}^{\text{tot}}}{1 + \frac{1}{k_{\text{L}}}}}{C_{\text{L}}^{\text{tot}}} = \frac{k_{\text{L}}}{k_{\text{L}} + 1} \quad (22)$$

The extraction performance factor ( $pf$ ) is defined as

$$pf_{\text{L}} = f_{\text{L}} ee_{\text{org}} \quad (23)$$

## Detailed derivation process for Regression of the Complexation Equilibrium

### Constants

The interfacial reaction equations for D- and L-PHG are

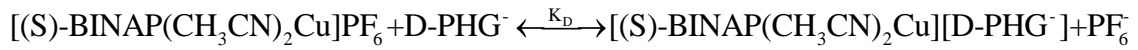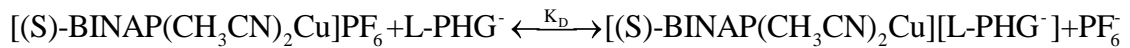

The complexation equilibrium constants are written as defined above (eqs 2 and 3):

$$K_{\text{D}} = \frac{[\text{CuBD}]_{\text{org}} [\text{PF}_6^-]_{\text{w}}}{[\text{CuB}]_{\text{org}} [\text{D}^-]_{\text{w}}}$$

$$K_{\text{L}} = \frac{[\text{CuBL}]_{\text{org}} [\text{PF}_6^-]_{\text{w}}}{[\text{CuB}]_{\text{org}} [\text{L}^-]_{\text{w}}}$$

$[\text{CuBD}]_{\text{org}}$ ,  $[\text{PF}_6^-]_{\text{w}}$ ,  $[\text{CuB}]_{\text{org}}$  and  $[\text{D}^-]_{\text{w}}$  can be expressed in terms of  $k_{\text{D}}$  and  $k_{\text{L}}$  by

the following equations:

$$[\text{CuBD}]_{\text{org}} = C_{\text{D, org}}^{\text{tot}} = \frac{C_{\text{D}}^{\text{tot}}}{1 + \frac{1}{k_{\text{D}}}} \quad (24)$$

$$\begin{aligned}
[\text{CuB}]_{\text{org}} &= C_{\text{CuB}}^{\text{tot}} - [\text{CuBD}]_{\text{org}} - [\text{CuBL}]_{\text{org}} \\
&= C_{\text{CuB}}^{\text{tot}} - C_{\text{D, org}}^{\text{tot}} - C_{\text{L, org}}^{\text{tot}} \\
&= C_{\text{CuB}}^{\text{tot}} - \frac{C_{\text{D}}^{\text{tot}}}{1 + 1/k_{\text{D}}} - \frac{C_{\text{L}}^{\text{tot}}}{1 + 1/k_{\text{L}}}
\end{aligned} \tag{25}$$

$$\begin{aligned}
[\text{PF}_6^-]_{\text{w}} &= C_{\text{D, org}}^{\text{tot}} + C_{\text{L, org}}^{\text{tot}} \\
&= \frac{C_{\text{L}}^{\text{tot}}}{1 + 1/k_{\text{L}}} + \frac{C_{\text{D}}^{\text{tot}}}{1 + 1/k_{\text{D}}}
\end{aligned} \tag{26}$$

$$\begin{aligned}
[\text{D}^-]_{\text{w}} &= \frac{[\text{D}^-]_{\text{w}}}{[\text{D}^-]_{\text{w}} + [\text{DH}]_{\text{w}}} C_{\text{D, aq}}^{\text{tot}} \\
&= \frac{[\text{D}^-]_{\text{w}}}{[\text{D}^-]_{\text{w}} + \frac{[\text{D}^-]_{\text{w}}[\text{H}^+]}{K_{\text{a}}}} C_{\text{D, aq}}^{\text{tot}} \\
&= \frac{1}{1 + \frac{[\text{H}^+]}{K_{\text{a}}}} C_{\text{D, aq}}^{\text{tot}} \\
&= \frac{C_{\text{D}}^{\text{tot}}}{A(1 + k_{\text{D}})}
\end{aligned} \tag{27}$$

With eqs 24-27 substituted in eq 2:

$$K_{\text{D}} = \frac{\frac{C_{\text{D}}^{\text{tot}}}{1 + 1/k_{\text{D}}} \left( \frac{C_{\text{L}}^{\text{tot}}}{1 + 1/k_{\text{L}}} + \frac{C_{\text{D}}^{\text{tot}}}{1 + 1/k_{\text{D}}} \right)}{\left( C_{\text{CuB}}^{\text{tot}} - \frac{C_{\text{D}}^{\text{tot}}}{1 + 1/k_{\text{D}}} - \frac{C_{\text{L}}^{\text{tot}}}{1 + 1/k_{\text{L}}} \right) \left( \frac{C_{\text{D}}^{\text{tot}}}{A(1 + k_{\text{D}})} \right)} \tag{28}$$

With further treatment of eq 28, the following equation is obtained:

$$Ak_{\text{D}}^2 C_{\text{D}}^{\text{tot}} (k_{\text{L}} + 1) + Ak_{\text{D}} k_{\text{L}} C_{\text{L}}^{\text{tot}} (k_{\text{D}} + 1) = K_{\text{D}} [C_{\text{CuB}}^{\text{tot}} (k_{\text{D}} + 1)(k_{\text{L}} + 1) - k_{\text{D}} C_{\text{D}}^{\text{tot}} (k_{\text{L}} + 1) - k_{\text{L}} C_{\text{L}}^{\text{tot}} (k_{\text{D}} + 1)] \tag{29}$$

Similarly, the following equation can be obtained for  $K_{\text{L}}$ :

$$Ak_{\text{L}}^2 C_{\text{L}}^{\text{tot}} (k_{\text{D}} + 1) + Ak_{\text{D}} k_{\text{L}} C_{\text{D}}^{\text{tot}} (k_{\text{L}} + 1) = K_{\text{L}} [C_{\text{CuB}}^{\text{tot}} (k_{\text{D}} + 1)(k_{\text{L}} + 1) - k_{\text{D}} C_{\text{D}}^{\text{tot}} (k_{\text{L}} + 1) - k_{\text{L}} C_{\text{L}}^{\text{tot}} (k_{\text{D}} + 1)] \tag{30}$$

### Information about the structure of the selector ([*(S)*-BINAP(CH<sub>3</sub>CN)<sub>2</sub>Cu][PF<sub>6</sub>])

[*(S)*-BINAP(CH<sub>3</sub>CN)<sub>2</sub>Cu][PF<sub>6</sub>] was prepared by literature method.<sup>S1</sup> Chemical structure of [*(S)*-BINAP(CH<sub>3</sub>CN)<sub>2</sub>Cu][PF<sub>6</sub>] is shown in the following figure.

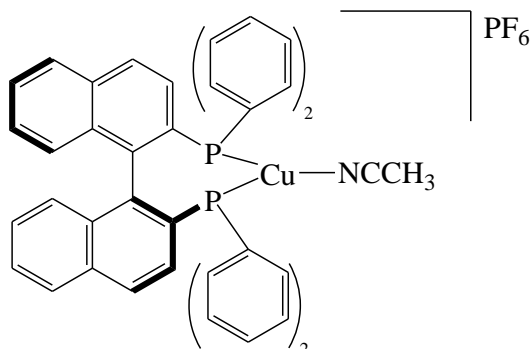

### Chromatogram of enantiomeric separation of phenylglycine

A typical chromatogram of enantiomeric separation of phenylglycine

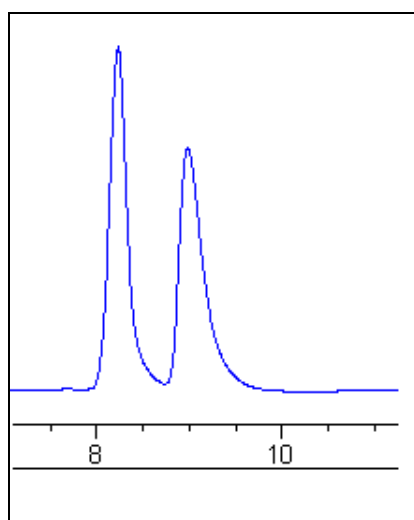

The retention time is 8.222 min for L-PHG and 8.975 min for D-PHG. Each test was run in triplicate under identical conditions, and the standard deviation is in the range of 2%.

### Reference

S1. Blue, E. D.; Davis, A.; Conner, D.; Gunnoe, T. B.; Boyle, P. D.; White, P. S. Synthesis, Solid-State Crystal Structure, and Reactivity of a Monomeric Copper(I) Anilido Complex. *J. Am. Chem. Soc.* **2003**, *125*, 9435-9441.
